# Supplementary material for: Renal Function Interferes with Copeptin in Prediction of Major Adverse Cardiac Events in Patients Undergoing Vascular Surgery
Source: PLoS One. 2015 Apr 13;10(4):e0123093. doi: 10.1371/journal.pone.0123093 (PMC4395325; doi:10.1371/journal.pone.0123093)
Supplement: S1 Table — Underlying Data table. (XLSX) [file pone.0123093.s002.xlsx]

## Sheet: Sheet1
id	sex	age	height	weight	bmi	op_type	cstensym	art_htn	heartfailure	diabetes	CAD	stroke_tia	smoker	copd	asthma	rcri	rcri_c	krea_pre	CKD_1and2	CKD_3	CKD4and5	gfr_mdrd	cp_pre	cp_po	cp_del	cp_abs	tr_po	mortalit	mace	stroke
1	1	44	171	74	25.3	2	#NULL!	0	0	0	0	0	0	0	0	1	1	#NULL!	1	0	0	60	13.17	144.9	131.73	131.73	4.34	0	0	#NULL!
3	1	73	170	109	37.7	2	#NULL!	0	0	1	1	0	0	0	0	4	3	119	0	1	0	52	14.23	97	82.77	82.77	260.6	0	1	#NULL!
4	1	56	180	78	24.1	2	#NULL!	1	0	0	0	0	1	1	0	2	2	184	0	1	0	33	4.8	309.2	304.4	304.4	14.1	0	0	#NULL!
6	1	67	173	72	24.1	2	#NULL!	1	0	1	1	0	0	0	0	3	3	69	1	0	0	60	4.8	93.28	88.48	88.48	7.27	0	0	#NULL!
7	1	70	174	80	26.4	2	#NULL!	1	0	0	1	0	1	0	0	3	3	99	1	0	0	60	19.7	33.73	14.03	14.03	6.42	0	0	#NULL!
8	1	54	176	87	28.1	2	#NULL!	0	0	0	0	0	1	0	0	1	1	90	1	0	0	60	17.17	30.02	12.85	12.85	11.22	0	0	#NULL!
9	1	63	176	86	27.8	2	#NULL!	0	0	0	1	0	0	0	0	2	2	86	1	0	0	60	4.8	86.89	82.09	82.09	7.66	0	0	#NULL!
11	2	67	164	93	34.6	2	#NULL!	1	0	0	0	0	1	0	0	1	1	64	1	0	0	60	4.8	134.1	129.3	129.3	5.66	0	0	#NULL!
12	1	62	168	87	30.8	2	#NULL!	1	0	0	1	0	1	1	0	3	3	448	0	0	1	20	225.4	691.2	465.8	465.8	28.25	0	0	#NULL!
13	1	70	158	55	22	2	#NULL!	1	0	0	1	0	1	1	0	2	2	92	1	0	0	60	12.87	87.86	74.99	74.99	13.71	0	0	#NULL!
14	2	51	168	58	20.5	2	#NULL!	0	0	0	0	0	1	0	0	1	1	48	1	0	0	60	4.8	4.8	0	0	3	0	0	#NULL!
15	1	63	186	86	24.9	2	#NULL!	1	0	0	0	0	0	0	0	1	1	105	1	0	0	60	9.308	15.94	6.63	6.63	7.87	0	0	#NULL!
16	1	85	178	79	24.9	2	#NULL!	1	1	0	1	0	0	0	0	3	3	105	0	1	0	58	39.58	47.99	8.41	8.41	12.96	0	0	#NULL!
17	1	79	175	86	28.1	2	#NULL!	1	0	0	1	1	0	0	0	3	3	112	0	1	0	55	7.883	15.27	7.39	7.39	41.13	0	0	#NULL!
18	1	56	180	75	23.1	2	#NULL!	1	0	0	0	0	0	0	0	1	1	79	1	0	0	60	4.8	87.33	82.53	82.53	13.92	0	0	#NULL!
19	1	56	180	104	32.1	2	#NULL!	1	0	0	0	0	0	0	0	1	1	84	1	0	0	60	7	29.89	22.89	22.89	34.7	0	0	#NULL!
20	1	67	180	67	20.7	2	#NULL!	1	0	0	1	0	1	1	0	3	3	97	1	0	#NULL!	60	14.69	18.59	3.9	3.9	20.03	0	0	#NULL!
21	1	53	182	92	27.8	2	#NULL!	0	0	0	1	0	1	0	0	2	2	76	1	0	0	60	14.49	44.63	30.14	30.14	20.7	0	0	#NULL!
22	1	54	180	105	32.4	2	#NULL!	0	0	1	0	0	1	0	0	2	2	65	1	0	0	60	7.073	29.37	22.3	22.3	5.92	0	0	#NULL!
23	1	66	185	74.5	21.9	2	#NULL!	1	0	0	1	0	0	0	0	3	3	596	0	0	1	20	106.8	217.5	110.7	110.7	51.31	0	0	#NULL!
24	1	66	176	60	19.4	2	#NULL!	1	0	0	1	0	1	0	0	3	3	200	0	0	1	29	158.7	278.9	120.2	120.2	161	0	1	#NULL!
26	1	69	182	70	21.1	2	#NULL!	0	0	0	1	0	0	0	0	3	3	94	1	0	0	60	26.38	74.48	48.1	48.1	26.39	0	0	#NULL!
27	2	73	164	65	24.2	2	#NULL!	1	0	0	0	1	0	1	0	3	3	188	0	0	1	23	6.839	64.2	57.36	57.36	29.12	0	0	#NULL!
28	1	69	172	100	33.8	2	#NULL!	1	0	1	1	0	0	0	0	3	3	69	1	0	0	60	4.8	12.16	7.36	7.36	8.93	0	0	#NULL!
29	1	67	168	90	31.9	2	#NULL!	1	0	0	1	0	1	0	0	3	3	176	0	1	0	34	26.31	351.6	325.29	325.29	270.9	0	0	#NULL!
31	1	70	180	78	24.1	2	#NULL!	1	0	0	0	0	1	1	0	1	1	75	1	0	0	60	10.78	31.09	20.31	20.31	31.57	0	0	#NULL!
33	1	79	171	70	23.9	2	#NULL!	0	0	0	0	0	0	0	0	1	1	57	1	0	0	60	5.477	19.4	13.92	13.92	6.92	0	0	#NULL!
34	2	51	165	82	30.1	2	#NULL!	1	0	1	0	0	0	0	0	2	2	27	1	0	0	60	6.753	74.57	67.82	67.82	18.5	0	0	#NULL!
35	1	53	171	60	20.5	2	#NULL!	1	0	0	0	0	1	0	0	1	1	73	1	0	0	60	8.102	4.8	-3.3	3.3	12.5	0	0	#NULL!
38	1	75	177	98	31.3	2	#NULL!	1	0	0	1	0	0	0	0	3	3	98	1	0	0	60	12.87	179.2	166.33	166.33	40.33	0	0	#NULL!
39	1	57	172	97	32.8	2	#NULL!	0	0	0	0	0	0	0	0	1	1	78	1	0	0	60	5.237	24.47	19.23	19.23	12.49	0	0	#NULL!
41	1	72	180	80	24.7	2	#NULL!	1	0	0	0	0	0	1	0	1	1	112	0	1	0	56	6.585	36.49	29.9	29.9	30.28	0	0	#NULL!
42	1	69	164	103	38.3	2	#NULL!	1	1	0	1	0	0	1	0	3	3	76	1	0	0	60	11.11	24.36	13.25	13.25	70.65	0	0	#NULL!
44	1	69	176	74	23.9	2	#NULL!	1	0	0	0	0	0	0	0	1	1	64	1	0	0	60	9.348	20.01	10.66	10.66	10.75	0	0	#NULL!
45	1	75	185	108	31.6	2	#NULL!	1	0	0	1	0	2	0	0	2	2	97	1	0	0	60	4.8	127.8	123	123	21.32	0	0	#NULL!
46	1	65	180	107	33	2	#NULL!	1	0	0	0	0	0	0	0	1	1	95	1	0	0	60	4.8	24.93	20.13	20.13	5.41	0	0	#NULL!
47	1	42	200	90	22.5	2	#NULL!	1	0	0	0	0	0	0	0	1	1	74	1	0	0	60	4.8	30.02	25.22	25.22	8.12	0	1	#NULL!
48	1	67	180	95	29.3	2	#NULL!	1	1	0	0	0	0	0	0	2	2	85	1	0	0	60	4.8	46.4	41.6	41.6	18.84	0	0	#NULL!
50	1	63	175	100	32.7	2	#NULL!	1	0	0	0	0	0	0	0	1	1	58	1	0	0	60	9.184	11.59	2.41	2.41	74.35	0	0	#NULL!
51	1	65	187	117	33.5	2	#NULL!	1	1	0	1	1	1	1	0	4	3	70	1	0	0	60	7.89	27.01	19.12	19.12	12.21	0	0	#NULL!
53	1	69	182	85	25.7	2	#NULL!	1	0	0	0	0	2	0	0	1	1	79	1	0	0	60	10.9	12.21	1.31	1.31	12.77	0	0	#NULL!
54	1	56	180	106	32.7	2	#NULL!	1	0	0	0	0	2	0	0	1	1	97	1	0	0	60	19.28	10.65	-8.63	8.63	3.66	0	0	#NULL!
56	1	79	178	72	22.7	2	#NULL!	1	0	0	0	0	0	1	0	1	1	62	1	0	0	60	10.34	42.5	32.16	32.16	13.61	0	0	#NULL!
57	1	58	180	90	27.8	2	#NULL!	1	0	0	0	0	0	0	0	1	1	98	1	0	0	60	15.57	31.46	15.89	15.89	9.46	0	0	#NULL!
58	1	69	181	84	25.6	2	#NULL!	0	0	0	0	0	1	0	0	1	1	59	1	0	0	60	27.79	31.81	4.02	4.02	35.3	0	0	#NULL!
59	1	82	166	73	26.5	2	#NULL!	1	0	0	1	0	0	0	0	2	2	77	1	0	0	60	4.8	78.26	73.46	73.46	23.12	0	0	#NULL!
60	1	61	179	80	25	2	#NULL!	1	0	0	0	0	0	0	0	1	1	64	1	0	0	60	11.82	12.77	0.95	0.95	7.09	0	0	#NULL!
61	1	70	170	82	28.4	2	#NULL!	1	1	1	1	0	0	0	0	5	3	98	1	0	0	60	4.8	53.78	48.98	48.98	70.36	0	0	#NULL!
62	1	77	167	76	27.3	2	#NULL!	0	0	0	0	0	0	0	0	1	1	78	1	0	0	60	4.8	11.23	6.43	6.43	14.55	0	0	#NULL!
63	1	69	170	75	26	2	#NULL!	1	0	0	0	0	0	0	0	2	2	330	0	0	1	20	23.05	137.6	114.55	114.55	26.57	0	0	#NULL!
64	1	64	183	96	28.7	2	#NULL!	1	0	0	0	1	1	0	0	3	3	83	1	0	0	60	4.8	12.08	7.28	7.28	7.89	0	0	#NULL!
65	1	73	165	70	25.7	2	#NULL!	1	0	0	1	0	1	0	0	2	2	75	1	0	0	60	4.8	9.269	4.47	4.47	26.73	0	0	#NULL!
66	1	68	190	96	26.6	2	#NULL!	1	0	0	1	0	2	0	0	2	2	108	0	1	0	59	16.23	58.64	42.41	42.41	17.5	0	0	#NULL!
67	1	71	182	115	34.7	2	#NULL!	1	0	0	1	0	0	0	0	2	2	131	0	1	0	47	29.73	72.83	43.1	43.1	9.68	0	0	#NULL!
69	1	84	178	98	30.9	2	#NULL!	1	1	0	1	1	0	0	0	5	3	161	0	1	0	36	38.48	171.7	133.22	133.22	15.75	0	0	#NULL!
70	1	75	174	74	24.4	2	#NULL!	1	0	0	0	0	0	0	0	2	2	149	0	1	0	40	12.3	86.88	74.58	74.58	19.99	0	0	#NULL!
71	2	76	158	89	35.7	3	#NULL!	1	0	1	1	0	0	0	0	4	3	202	0	0	1	21	31.89	66.49	34.6	34.6	52.98	0	0	#NULL!
72	1	69	180	98	30.2	2	#NULL!	1	0	0	0	1	0	0	0	2	2	85	1	0	0	60	9.448	13.02	3.57	3.57	8.99	0	0	#NULL!
73	2	81	155	60	25	3	#NULL!	1	0	0	0	0	0	0	0	1	1	86	0	1	0	55	21.93	26.21	4.28	4.28	12.95	0	0	#NULL!
74	2	81	164	54	20.1	3	#NULL!	1	0	0	0	0	2	0	0	1	1	53	1	0	0	60	7.88	38.39	30.51	30.51	10.73	0	0	#NULL!
75	1	63	170	72	24.9	3	#NULL!	1	0	0	0	0	1	0	0	1	1	#NULL!	1	0	0	60	10.45	12.69	2.24	2.24	4.78	0	0	#NULL!
76	1	62	185	96	28	2	#NULL!	1	0	1	0	0	2	0	0	2	2	67	1	0	0	60	6.164	44.53	38.37	38.37	10.96	0	0	#NULL!
77	2	64	165	75	27.5	2	#NULL!	1	0	1	1	0	0	0	0	3	3	84	0	1	0	59	18.24	252.5	234.26	234.26	38.71	0	0	#NULL!
78	1	65	170	126	43.6	2	#NULL!	1	0	0	1	0	2	0	0	2	2	78	1	0	0	60	7.193	32.18	24.99	24.99	7.27	0	0	#NULL!
79	2	77	158	65	26	2	#NULL!	1	0	0	1	1	0	0	0	3	3	77	1	0	0	60	9.362	14.16	4.8	4.8	6.66	0	0	#NULL!
80	1	72	159	69	27.3	2	#NULL!	1	0	0	0	1	2	0	0	3	3	88	1	0	0	60	25.01	206.8	181.79	181.79	49.53	0	0	#NULL!
81	1	67	180	96	29.6	2	#NULL!	1	0	0	0	0	1	1	0	1	1	88	1	0	0	60	16.14	102.2	86.06	86.06	11.2	0	0	#NULL!
82	1	61	160	69	27	2	#NULL!	0	1	0	0	1	0	0	0	4	3	134	0	1	0	47	36.83	54.17	17.34	17.34	117	0	1	#NULL!
83	1	75	183	90	26.9	1	0	1	0	1	1	0	2	0	0	2	2	92	1	0	0	60	6.443	19.24	12.8	12.8	11.84	0	0	#NULL!
84	1	72	176	74	23.9	3	#NULL!	0	0	1	0	0	0	1	0	3	3	173	0	1	0	34	19.79	51.76	31.97	31.97	37.25	0	0	#NULL!
85	1	50	172	70	23.7	1	1	0	0	0	1	1	2	0	0	2	2	88	1	0	0	60	7.57	10.54	2.97	2.97	9.21	0	0	#NULL!
86	2	75	164	77	28.6	1	0	1	0	0	1	0	0	0	0	1	1	117	0	1	0	39	16.43	28.74	12.31	12.31	15.42	0	0	#NULL!
87	1	65	186	56	16.2	3	#NULL!	1	0	0	1	0	1	0	0	3	3	107	1	0	0	60	7.221	49.05	41.83	41.83	14.8	0	0	#NULL!
88	1	70	166	75	27.2	3	#NULL!	1	0	0	0	0	1	1	0	1	1	129	0	1	0	48	13.49	246.4	232.91	232.91	26.12	0	0	#NULL!
89	1	74	170	70	24.2	2	#NULL!	1	0	0	0	0	1	0	0	1	1	74	1	0	0	60	9.217	61.76	52.54	52.54	7.55	0	0	#NULL!
90	1	69	172	73	24.7	2	#NULL!	1	0	0	0	0	0	1	0	1	1	87	1	0	0	60	4.8	54.82	50.02	50.02	6.06	0	0	#NULL!
91	1	72	180	84	25.9	3	#NULL!	0	0	0	1	0	0	0	0	3	3	186	0	1	0	31	17.57	200.5	182.93	182.93	61.3	0	0	#NULL!
92	1	61	174	90	29.7	2	#NULL!	1	1	0	1	0	1	0	0	3	3	96	1	0	0	60	17.59	378.1	360.51	360.51	49.21	0	1	#NULL!
93	1	80	178	87	27.5	2	#NULL!	1	0	0	0	0	0	0	0	1	1	136	0	1	0	44	4.8	39.98	35.18	35.18	47.18	0	0	#NULL!
94	1	64	169	80	28	1	0	1	0	1	1	0	1	0	0	3	3	142	0	1	0	44	62.7	78.69	15.99	15.99	58.94	0	0	#NULL!
95	1	51	184	90	26.6	2	#NULL!	0	1	0	0	0	1	0	0	2	2	59	1	0	0	60	4.8	18.31	13.51	13.51	8.34	0	0	#NULL!
96	1	70	174	82	27.1	2	#NULL!	1	1	1	1	0	0	0	0	5	3	115	0	1	0	55	21.29	90.17	68.88	68.88	19.81	0	0	#NULL!
97	2	58	158	58	23.2	1	0	1	0	0	1	0	0	0	0	1	1	66	1	0	0	60	4.8	125.1	120.3	120.3	3.5	0	0	#NULL!
98	1	59	178	79	24.9	3	#NULL!	1	0	1	0	0	1	0	0	3	3	124	0	1	0	52	49.47	59.19	9.72	9.72	10.75	0	0	#NULL!
99	1	46	178	95	30	3	#NULL!	1	0	0	0	0	0	1	0	2	2	210	0	1	0	30	17.86	124.2	106.34	106.34	23.59	0	0	#NULL!
100	1	79	174	75	24.8	2	#NULL!	0	0	0	0	0	0	0	0	1	1	113	0	1	0	54	11.59	11.96	0.37	0.37	27.57	0	0	#NULL!
101	2	80	163	63	23.7	3	#NULL!	0	0	0	0	0	2	0	0	1	1	79	1	0	0	60	21.75	21.96	0.21	0.21	9.75	0	0	#NULL!
102	1	69	178	84	26.5	2	#NULL!	1	0	1	0	0	1	0	0	2	2	96	1	0	0	60	4.8	24.71	19.91	19.91	17.54	0	0	#NULL!
103	1	75	179	75	23.4	1	1	0	0	0	0	1	1	0	0	1	1	88	1	0	0	60	7.998	15.87	7.87	7.87	3.54	0	0	1
104	2	44	176	76	24.5	2	#NULL!	0	0	0	0	0	0	0	0	1	1	58	1	0	0	60	9.611	17.73	8.12	8.12	28.5	0	0	#NULL!
105	1	79	176	75	24.2	3	#NULL!	1	1	0	0	1	0	0	0	3	3	120	0	1	0	51	31.79	40.36	8.57	8.57	23.08	0	1	#NULL!
106	2	75	164	70	26	1	0	1	0	0	1	0	0	0	0	1	1	54	1	0	0	60	6.142	39.84	33.7	33.7	8.83	0	0	#NULL!
107	1	45	186	110	31.8	1	1	0	0	1	0	1	0	0	0	2	2	65	1	0	0	60	7.509	8.981	1.47	1.47	12.15	0	0	#NULL!
108	1	80	176	100	32.3	2	#NULL!	1	0	0	0	0	0	0	0	1	1	104	1	0	0	60	10.7	83.18	72.48	72.48	21.68	0	0	#NULL!
109	1	85	177	89	28.4	1	1	1	0	1	1	1	0	0	0	3	3	73	1	0	0	60	8.046	21.15	13.1	13.1	30.38	0	0	#NULL!
110	1	60	173	95	31.7	2	#NULL!	1	0	0	0	0	0	0	0	1	1	68	1	0	0	60	9.873	8.537	-1.33	1.33	10.48	0	0	#NULL!
111	1	81	175	78	25.5	1	0	0	0	0	0	0	0	0	0	0	0	92	1	0	0	60	9.536	10.39	0.85	0.85	9.58	0	0	#NULL!
112	1	71	180	86	26.5	2	#NULL!	1	0	0	0	0	0	0	0	1	1	94	1	0	0	60	21.02	50.34	29.32	29.32	18.31	0	0	#NULL!
113	1	80	182	105	31.7	3	#NULL!	1	0	1	0	0	1	1	0	3	3	241	0	0	1	23	45.42	102	56.58	56.58	106.6	0	1	#NULL!
114	1	77	186	85	24.6	2	#NULL!	1	0	0	0	0	0	0	0	2	2	153	0	1	0	38	16.62	173.1	156.48	156.48	18.09	0	0	#NULL!
115	1	59	192	93	25.2	2	#NULL!	0	0	0	0	0	1	0	0	1	1	72	1	0	0	60	7.979	38.77	30.79	30.79	11.06	0	0	#NULL!
116	1	59	186	130	37.6	2	#NULL!	1	0	1	0	0	0	0	0	2	2	72	1	0	0	60	11.31	31.37	20.06	20.06	3.79	0	0	#NULL!
117	1	74	167	68	24.4	1	0	0	0	1	1	0	0	0	0	2	2	139	0	1	0	43	4.8	66.97	62.17	62.17	6.39	0	0	#NULL!
118	1	71	176	73	23.6	3	#NULL!	1	0	0	0	0	1	0	0	1	1	70	1	0	0	60	15.93	26.91	10.98	10.98	6.28	0	0	#NULL!
119	1	70	172	80	27	2	#NULL!	1	0	0	1	0	0	0	0	2	2	102	1	0	0	60	19.13	167.4	148.27	148.27	16.48	0	0	#NULL!
120	1	61	178	70	22.1	2	#NULL!	1	0	0	1	0	0	1	0	2	2	79	1	0	0	60	11.87	17.09	5.22	5.22	12.76	0	0	#NULL!
121	1	78	173	83	27.7	1	0	1	0	0	1	0	0	0	0	1	1	#NULL!	1	0	0	60	8.001	15.96	7.96	7.96	15.98	0	0	#NULL!
122	1	68	175	95	31	2	#NULL!	0	0	0	0	0	1	0	0	1	1	56	1	0	0	60	6.023	47.94	41.92	41.92	14.19	0	0	#NULL!
123	1	54	174	75	24.8	2	#NULL!	1	0	0	0	0	0	1	0	2	2	916	0	0	1	20	165.8	413.4	247.6	247.6	60.97	0	1	#NULL!
124	1	81	170	85	29.4	3	#NULL!	0	0	1	1	1	0	0	0	4	3	118	0	1	0	51	35.85	86.16	50.31	50.31	13.79	0	0	#NULL!
125	1	67	162	72	27.4	1	0	1	1	0	1	0	0	0	0	2	2	58	1	0	0	60	4.8	10.84	6.04	6.04	7.53	0	0	#NULL!
126	1	71	182	85	25.7	1	0	1	0	0	1	0	0	0	0	1	1	95	1	0	0	60	18.28	16.42	-1.86	1.86	7.17	0	0	#NULL!
127	1	81	175	80	26.1	3	#NULL!	0	0	1	0	0	0	1	0	2	2	90	1	0	0	60	54.68	45.89	-8.79	8.79	32.59	0	0	#NULL!
128	2	70	155	65	27.1	1	0	1	0	0	1	0	0	0	0	1	1	130	0	1	0	35	12.66	354	341.34	341.34	12.11	0	0	#NULL!
129	1	50	170	72	24.9	2	#NULL!	1	0	0	0	0	1	0	0	1	1	87	1	0	0	60	16.46	187.3	170.84	170.84	42.51	0	0	#NULL!
130	1	52	175	85	27.8	3	#NULL!	0	0	0	0	0	0	0	0	1	1	83	1	0	0	60	9.301	6.596	-2.7	2.7	4.08	0	0	#NULL!
131	1	75	180	82	25.3	2	#NULL!	1	0	0	1	0	1	0	0	3	3	118	0	1	0	52	24.54	63.16	38.62	38.62	25.17	0	0	#NULL!
132	2	75	160	61	23.8	3	#NULL!	1	0	0	0	0	0	0	0	1	1	51	1	0	0	60	14.9	30.3	15.4	15.4	23.42	0	0	#NULL!
133	2	53	165	53	19.5	1	0	1	0	0	1	0	1	0	0	1	1	114	0	1	0	43	11.91	12.09	0.18	0.18	7.02	0	0	#NULL!
134	2	58	167	62	22.2	2	#NULL!	1	0	0	0	0	0	0	0	2	2	346	0	0	1	20	37.59	170	132.41	132.41	23.96	0	0	#NULL!
135	1	54	192	90	24.4	2	#NULL!	0	0	0	0	0	1	0	0	1	1	94	1	0	0	60	10.52	7.366	-3.15	3.15	4.97	0	0	#NULL!
136	1	77	173	84	28.1	1	0	1	0	0	1	0	0	0	0	2	2	#NULL!	0	0	1	20	8.495	45.38	36.88	36.88	16.83	0	0	#NULL!
137	1	75	164	72	26.8	1	0	1	0	0	0	0	0	0	0	0	0	135	0	1	0	45	78.01	20.86	-57.15	57.15	16.75	0	0	#NULL!
138	2	65	162	50	19.1	1	1	0	0	0	0	1	1	0	0	1	1	44	1	0	0	60	4.8	5.827	1.03	1.03	10.1	0	0	#NULL!
139	1	70	172	85	28.7	2	#NULL!	1	0	0	0	1	0	0	0	2	2	104	1	0	0	60	5.646	44.12	38.47	38.47	6.47	0	0	#NULL!
140	1	48	190	120	33.2	2	#NULL!	1	0	1	0	0	0	0	0	2	2	102	1	0	0	60	11.72	77.52	65.8	65.8	184.2	0	0	#NULL!
141	1	67	180	87	26.9	1	1	1	0	0	0	1	0	1	0	1	1	93	1	0	0	60	13.78	4.8	-8.98	8.98	19.98	0	0	#NULL!
142	2	71	162	70	26.7	1	0	1	0	0	0	0	1	0	0	0	0	87	0	1	0	56	4.8	9.404	4.6	4.6	8.61	0	0	#NULL!
143	2	49	168	72	25.5	1	1	1	0	0	0	1	0	0	0	1	1	85	1	0	0	60	5.611	26.47	20.86	20.86	5.09	0	0	#NULL!
144	1	58	167	104	37.3	3	#NULL!	1	0	0	0	1	0	0	0	3	3	714	0	0	1	20	165.7	208.7	43	43	80.47	0	1	#NULL!
145	2	83	161	90	34.7	1	1	1	0	1	1	1	0	0	0	3	3	122	0	1	0	37	19.21	36.8	17.59	17.59	21.29	0	0	#NULL!
146	1	66	172	77	26	3	#NULL!	1	0	0	1	0	0	0	0	2	2	77	1	0	0	60	14.49	14.38	-0.11	0.11	5.74	0	0	#NULL!
147	1	74	174	76	25.1	1	1	1	0	0	1	1	0	0	0	2	2	110	0	1	0	57	17.98	26.5	8.52	8.52	15.55	0	0	#NULL!
148	1	76	165	90	33.1	1	0	1	0	0	0	0	1	0	0	0	0	186	0	1	0	31	30.42	101.2	70.78	70.78	52.02	0	0	#NULL!
149	1	82	175	75	24.5	3	#NULL!	1	0	0	0	0	1	0	0	1	1	86	1	0	0	60	14.93	12.27	-2.66	2.66	7.89	0	0	#NULL!
150	1	63	172	71	24	3	#NULL!	0	0	0	1	0	1	0	0	2	2	70	1	0	0	60	4.8	10.81	6.01	6.01	5.6	0	0	#NULL!
151	1	83	161	75	28.9	2	#NULL!	1	0	1	0	0	0	1	0	2	2	103	1	0	0	60	5.211	85.14	79.93	79.93	12.06	0	0	#NULL!
152	1	69	166	70	25.4	1	0	0	0	0	0	0	1	0	0	0	0	83	1	0	0	60	8.864	6.453	-2.41	2.41	5.91	0	0	#NULL!
153	1	69	186	94	27.2	2	#NULL!	1	1	1	1	0	0	0	0	4	3	132	0	1	0	47	15.78	60.13	44.35	44.35	13.1	0	0	#NULL!
154	1	74	167	85	30.5	2	#NULL!	1	1	0	1	0	0	0	0	3	3	155	0	1	0	38	16.73	494.4	477.67	477.67	22.85	0	1	#NULL!
155	1	71	183	95	28.4	3	#NULL!	1	0	1	1	0	0	0	0	3	3	76	1	0	0	60	10.45	11.43	0.98	0.98	12.58	0	0	#NULL!
156	1	75	168	72	25.5	1	0	1	0	0	1	1	0	0	0	2	2	138	0	1	0	44	21.5	30.4	8.9	8.9	10.1	0	0	#NULL!
157	1	66	182	70	21.1	1	0	0	0	0	0	0	0	0	0	0	0	80	1	0	0	60	11.36	16.65	5.29	5.29	12.99	0	0	#NULL!
158	1	64	170	83	28.7	1	0	1	0	1	0	0	0	0	0	1	1	76	1	0	0	60	10.56	20.56	10	10	7.51	0	0	#NULL!
159	1	73	174	98	32.4	1	1	1	0	0	1	1	0	0	0	2	2	125	0	1	0	49	9.549	7.033	-2.52	2.52	19.02	0	0	#NULL!
160	1	78	172	67	22.6	3	#NULL!	1	0	0	0	0	0	0	0	1	1	59	1	0	0	60	4.8	5.601	0.8	0.8	11.07	0	0	#NULL!
161	1	66	183	95	28.4	2	#NULL!	1	0	1	0	0	0	0	0	2	2	121	0	1	0	52	34.28	157.5	123.22	123.22	33.86	0	0	#NULL!
162	1	77	173	83	27.7	1	0	1	0	0	1	0	0	0	0	2	2	134	0	1	0	45	12.31	24.36	12.05	12.05	16.65	0	0	#NULL!
164	1	57	186	135	39	3	#NULL!	1	0	0	0	1	0	0	0	2	2	204	0	0	1	29	18.92	40.65	21.73	21.73	41.12	0	0	#NULL!
165	1	59	167	103	36.9	3	#NULL!	1	0	0	0	0	0	0	0	2	2	904	0	0	1	20	152.5	217.7	65.2	65.2	89.81	0	0	#NULL!
166	1	66	172	71	24	1	0	1	0	0	0	1	0	0	0	1	1	80	1	0	0	60	5.302	4.8	-0.5	0.5	3	0	0	#NULL!
167	1	75	186	88	25.4	2	#NULL!	1	0	0	0	0	1	0	0	1	1	72	1	0	0	60	17.85	199.8	181.95	181.95	5.05	0	0	#NULL!
168	1	59	181	81	24.7	2	#NULL!	1	0	0	0	0	1	0	0	1	1	91	1	0	0	60	13.58	89.05	75.47	75.47	16.66	0	0	#NULL!
169	1	79	172	80	27	1	1	1	0	0	0	1	0	0	0	1	1	94	1	0	0	60	4.8	6.611	1.81	1.81	10.74	0	0	#NULL!
170	1	81	164	70	26	3	#NULL!	1	0	1	1	0	0	0	0	4	3	188	0	1	0	30	18.65	99.33	80.68	80.68	33.7	0	0	#NULL!
171	2	68	169	72	25.2	1	0	0	0	0	0	0	0	0	0	0	0	52	1	0	0	60	4.8	42.26	37.46	37.46	3.51	0	0	#NULL!
172	1	77	168	75	26.6	1	0	1	0	0	1	0	0	0	0	1	1	120	0	1	0	51	47.18	315.8	268.62	268.62	25.73	0	0	#NULL!
173	2	74	156	75	30.8	1	0	1	0	0	1	0	0	0	0	1	1	59	1	0	0	60	4.8	6.958	2.16	2.16	35.89	0	0	#NULL!
174	2	66	165	63	23.1	3	#NULL!	1	0	0	0	0	1	1	0	1	1	74	1	0	0	60	4.8	4.8	0	0	5.83	0	0	#NULL!
176	1	71	180	84	25.9	3	#NULL!	1	0	1	1	0	0	0	0	3	3	113	0	1	0	55	10.31	22.69	12.38	12.38	13.53	0	0	#NULL!
177	1	60	176	61	19.7	2	#NULL!	1	0	0	0	0	0	0	0	1	1	68	1	0	0	60	15.39	59.02	43.63	43.63	5.62	0	0	#NULL!
178	1	68	176	92	29.7	2	#NULL!	0	0	0	0	0	1	0	0	1	1	74	1	0	0	60	9.812	183.3	173.49	173.49	9.4	0	0	#NULL!
179	1	72	175	91	29.7	1	0	1	0	0	0	1	0	0	0	1	1	121	0	1	0	51	7.012	4.8	-2.21	2.21	10.14	0	0	#NULL!
180	2	79	170	90	31.1	3	#NULL!	1	0	1	0	0	0	0	0	2	2	77	1	0	0	60	69.31	45.46	-23.85	23.85	16.99	0	0	#NULL!
181	1	65	172	70	23.7	1	1	0	0	0	0	0	1	0	0	0	0	82	1	0	0	60	10.34	4.8	-5.54	5.54	17.12	0	0	#NULL!
182	1	74	174	85	28.1	3	#NULL!	1	0	1	0	0	0	0	0	2	2	104	1	0	0	60	12.04	31.27	19.23	19.23	20.09	0	0	#NULL!
183	1	71	179	76	23.7	1	0	1	0	1	0	0	0	0	0	2	2	202	0	0	1	28	32.93	52.58	19.65	19.65	46.71	0	0	#NULL!
184	1	72	183	79	23.6	2	#NULL!	1	0	0	0	0	0	0	0	1	1	101	1	0	0	60	10.88	6.626	-4.25	4.25	18.45	0	0	#NULL!
185	1	68	170	68	23.5	2	#NULL!	0	0	0	0	0	1	0	0	1	1	67	1	0	0	60	7.405	36.27	28.86	28.86	14.58	0	0	#NULL!
186	1	57	174	55	18.2	2	#NULL!	1	0	0	1	0	1	0	0	2	2	67	1	0	0	60	23.45	26.66	3.21	3.21	93.82	0	1	#NULL!
187	1	63	168	86	30.5	1	1	1	0	1	0	1	0	0	0	2	2	59	1	0	0	60	4.8	4.8	0	0	4.89	0	0	#NULL!
188	2	64	158	78	31.2	3	#NULL!	1	0	1	0	0	1	0	0	2	2	85	0	1	0	58	22.66	65.16	42.5	42.5	138.3	0	0	#NULL!
189	2	78	165	50	18.4	1	1	1	0	0	0	1	0	0	0	1	1	57	1	0	0	60	7.738	14.36	6.62	6.62	7.49	0	0	#NULL!
190	1	64	169	80	28	2	#NULL!	1	0	0	1	0	1	0	0	3	3	141	0	1	0	44	26.14	71.07	44.93	44.93	20.17	0	0	#NULL!
191	1	73	169	80	28	2	#NULL!	1	0	1	0	0	1	0	0	2	2	93	1	0	0	60	10.99	119.8	108.81	108.81	26.58	0	0	#NULL!
192	1	51	180	64	19.8	2	#NULL!	1	0	0	0	0	1	0	0	2	2	576	0	0	1	20	180.7	412.3	231.6	231.6	191.3	0	1	#NULL!
193	1	60	189	120	33.6	2	#NULL!	1	0	0	1	0	1	1	0	2	2	108	1	0	0	60	9.74	20.44	10.7	10.7	19.04	0	0	#NULL!
194	1	69	178	78	24.6	2	#NULL!	1	0	0	1	0	0	0	0	3	3	76	1	0	0	60	5.346	15.92	10.57	10.57	3.74	0	0	#NULL!
195	1	76	187	87	24.9	2	#NULL!	1	0	0	0	0	0	0	0	2	2	139	0	1	0	43	50.2	11.56	-38.64	38.64	16.12	0	0	#NULL!
196	2	84	158	63	25.2	1	0	1	0	0	1	0	0	0	0	1	1	86	0	1	0	55	10.28	23.16	12.88	12.88	18.14	0	0	#NULL!
197	2	66	164	90	33.5	3	#NULL!	1	0	1	1	0	0	0	0	3	3	104	0	1	0	46	20.3	34.07	13.77	13.77	5.66	0	0	#NULL!
198	1	45	178	77	24.3	2	#NULL!	0	0	0	0	0	1	0	0	1	1	71	1	0	0	60	36.1	8.448	-27.65	27.65	3	0	0	#NULL!
199	1	76	178	93	29.4	1	1	1	0	0	1	1	0	0	0	2	2	116	0	1	0	53	82.38	202	119.62	119.62	19.83	0	0	1
200	1	73	172	93	31.4	2	#NULL!	1	0	0	0	0	0	0	0	1	1	75	1	0	0	60	4.8	37.83	33.03	33.03	9.77	0	0	#NULL!
201	1	64	164	65	24.2	1	1	1	0	0	0	1	0	0	0	1	1	56	1	0	0	60	22.14	21.22	-0.92	0.92	7.91	0	0	#NULL!
202	2	81	157	50	20.3	1	0	1	0	0	0	0	0	0	0	0	0	61	1	0	0	60	6.081	74.11	68.03	68.03	8.63	0	0	#NULL!
203	1	61	170	90	31.1	1	0	0	0	0	0	0	0	0	0	1	1	86	1	0	0	60	31.7	83.1	51.4	51.4	5.49	0	0	#NULL!
204	1	41	174	70	23.1	3	#NULL!	1	0	0	0	0	0	0	0	2	2	133	0	1	0	51	13.51	33.84	20.33	20.33	22.5	0	0	#NULL!
206	1	73	170	85	29.4	2	#NULL!	1	0	0	1	0	0	0	0	3	3	132	0	1	0	46	321.6	34.5	-287.1	287.1	17.29	0	0	#NULL!
207	1	65	179	73	22.8	3	#NULL!	0	0	0	0	0	1	0	0	1	1	57	1	0	0	60	4.8	9.542	4.74	4.74	7.74	0	0	#NULL!
208	2	66	165	61	22.4	3	#NULL!	1	0	0	0	1	1	1	0	2	2	50	1	0	0	60	4.8	11.9	7.1	7.1	14.23	0	0	#NULL!
209	1	63	168	85	30.1	1	0	1	0	0	0	1	1	0	0	1	1	56	1	0	0	60	4.8	4.8	0	0	4.9	0	0	#NULL!
210	2	71	179	69	21.5	1	1	0	0	0	0	1	1	0	0	1	1	53	1	0	0	60	4.8	4.8	0	0	6.85	0	0	#NULL!
211	1	57	196	138	35.9	2	#NULL!	1	0	0	0	1	0	0	0	2	2	156	0	1	0	40	9.591	17.74	8.15	8.15	60.94	0	0	#NULL!
212	1	70	178	68	21.5	3	#NULL!	1	0	0	1	1	0	0	0	4	3	1023	0	0	1	20	184	222	38	38	149.2	0	0	#NULL!
213	1	70	168	68	24.1	1	0	0	0	0	0	0	1	0	0	0	0	66	1	0	0	60	17.9	8.035	-9.86	9.86	9.57	0	0	#NULL!
214	1	75	183	84	25.1	2	#NULL!	1	1	0	1	0	0	0	0	3	3	102	1	0	0	60	4.8	21.94	17.14	17.14	15.77	0	0	#NULL!
215	1	47	193	118	31.7	1	1	1	0	0	0	0	0	0	0	0	0	74	1	0	0	60	6.669	9.779	3.11	3.11	8.27	0	0	#NULL!
216	2	66	174	76	25.1	1	0	1	0	0	0	0	0	0	0	0	0	66	1	0	0	60	8.073	52.91	44.84	44.84	5.1	0	0	#NULL!
217	2	63	158	68	27.2	2	#NULL!	1	0	0	1	0	0	0	0	2	2	47	1	0	0	60	8.775	85.95	77.17	77.17	13.22	0	0	#NULL!
218	1	70	174	84	27.7	3	#NULL!	1	0	1	1	0	1	0	0	3	3	66	1	0	0	60	5.333	15.82	10.49	10.49	5.12	0	0	#NULL!
219	1	74	180	85	26.2	3	#NULL!	0	0	1	0	0	0	0	0	2	2	74	1	0	0	60	4.8	7.486	2.69	2.69	7.71	0	0	#NULL!
220	1	80	175	75	24.5	2	#NULL!	0	0	0	1	0	1	1	0	2	2	91	1	0	0	60	10.57	35.44	24.87	24.87	264.4	0	1	#NULL!
221	1	68	186	105	30.4	1	0	1	0	0	1	0	1	0	0	2	2	995	0	0	1	20	274.5	331.2	56.7	56.7	170.3	0	0	#NULL!
222	1	70	180	67	20.7	2	#NULL!	1	0	0	1	0	1	0	0	3	3	585	0	0	1	20	105.7	326.3	220.6	220.6	33.78	0	0	#NULL!
223	1	80	184	80	23.6	2	#NULL!	1	0	0	0	1	0	0	0	2	2	118	0	1	0	52	25.42	51.69	26.27	26.27	11.81	0	0	#NULL!
224	2	68	164	70	26	1	0	1	0	0	0	0	0	0	0	0	0	73	1	0	0	60	5.488	10.41	4.92	4.92	10.84	0	0	#NULL!
225	1	79	178	98	30.9	2	#NULL!	1	0	0	1	0	0	0	0	2	2	79	1	0	0	60	8.303	6.517	-1.78	1.78	20.62	0	0	#NULL!
226	1	71	160	60	23.4	2	#NULL!	1	0	1	0	0	1	0	0	2	2	84	1	0	0	60	31.78	120.3	88.52	88.52	37.05	0	0	#NULL!
228	1	74	173	78	26.1	3	#NULL!	0	0	0	0	1	0	0	0	2	2	104	1	0	0	60	5.839	15.41	9.57	9.57	20.28	0	0	#NULL!
229	2	71	175	55	18	1	1	0	0	0	0	1	0	0	0	1	1	41	1	0	0	60	10.58	5.158	-5.42	5.42	7.92	0	0	#NULL!
230	1	85	170	75	26	1	1	1	0	0	1	1	0	0	0	3	3	130	0	1	0	46	11.51	19.94	8.43	8.43	10.33	0	0	#NULL!
231	1	77	173	82	27.4	1	1	1	0	0	0	1	0	0	0	1	1	94	1	0	0	60	34.1	45	10.9	10.9	36.83	0	0	#NULL!
232	1	75	173	79	26.4	1	1	1	0	1	0	1	0	0	0	2	2	70	1	0	0	60	4.8	4.8	0	0	26.55	0	0	#NULL!
233	1	61	169	61	21.4	1	0	1	0	0	0	0	0	0	0	0	0	86	1	0	0	60	5.232	14.94	9.71	9.71	10.52	0	0	#NULL!
234	1	74	168	75	26.6	2	#NULL!	0	0	0	0	0	0	0	0	1	1	86	1	0	0	60	4.8	126.8	122	122	23.96	0	1	#NULL!
235	1	74	168	75	26.6	1	0	0	0	1	0	1	1	0	0	2	2	81	1	0	0	60	6.62	15.33	8.71	8.71	8.29	0	0	#NULL!
236	1	54	178	105	33.1	1	0	0	0	0	0	0	1	0	0	0	0	60	1	0	0	60	6.678	5.398	-1.28	1.28	3	0	0	#NULL!
237	1	70	174	81	26.8	3	#NULL!	1	1	0	0	0	0	0	0	2	2	72	1	0	0	60	10.15	16.82	6.67	6.67	9.79	0	0	#NULL!
238	1	65	176	95	30.7	2	#NULL!	1	0	0	0	0	0	0	0	1	1	81	1	0	0	60	4.8	44.13	39.33	39.33	8.36	0	0	#NULL!
239	2	63	163	65	24.5	2	#NULL!	0	0	0	1	0	1	0	0	2	2	60	1	0	0	60	4.8	183.6	178.8	178.8	37.23	0	0	#NULL!
240	2	67	168	74	26.2	1	0	0	0	1	1	0	0	0	0	2	2	52	1	0	0	60	4.8	4.8	0	0	9.71	0	0	#NULL!
241	1	59	188	80	22.6	3	#NULL!	0	0	0	0	0	1	0	0	1	1	67	1	0	0	60	4.8	8.552	3.75	3.75	5.64	0	0	#NULL!
242	1	64	165	72	26.4	3	#NULL!	1	0	0	1	0	1	0	0	3	3	118	0	1	0	54	12.52	287.3	274.78	274.78	6.46	0	0	#NULL!
243	1	60	173	103	34.4	3	#NULL!	1	0	1	0	0	0	0	0	2	2	70	1	0	0	60	4.8	29.74	24.94	24.94	23.12	0	0	#NULL!
244	1	64	174	98	32.4	2	#NULL!	1	0	0	0	0	1	0	0	1	1	69	1	0	0	60	7.101	13.31	6.21	6.21	1499	0	1	1
245	1	77	173	83	27.7	1	0	1	0	0	0	1	0	0	0	1	1	108	0	1	0	58	36.72	29.98	-6.74	6.74	40.22	0	0	#NULL!
246	1	86	174	70	23.1	2	#NULL!	1	0	0	1	0	0	0	0	2	2	92	1	0	0	60	29.15	17	-12.15	12.15	22.54	0	1	#NULL!
247	1	59	178	89	28.1	1	0	1	0	0	1	0	1	0	0	1	1	76	1	0	0	60	163.8	11.8	-152	152	5.23	0	0	#NULL!
248	2	67	162	63	24	1	1	0	0	0	0	1	0	0	0	1	1	50	1	0	0	60	8.763	4.8	-3.96	3.96	4.88	0	0	#NULL!
249	1	71	178	71	22.4	1	0	1	0	0	1	0	0	0	0	1	1	90	1	0	0	60	4.8	27.46	22.66	22.66	5.42	0	0	#NULL!
250	1	83	150	53	23.6	2	#NULL!	0	0	0	0	1	0	0	1	2	2	80	1	0	0	60	44	46.03	2.03	2.03	45.4	0	1	#NULL!
251	1	63	184	91	26.9	2	#NULL!	1	0	0	0	0	0	0	0	1	1	120	0	1	0	53	52.12	541.5	489.38	489.38	88.79	0	0	#NULL!
252	1	70	165	92	33.8	2	#NULL!	1	0	0	0	0	0	0	0	1	1	79	1	0	0	60	25.79	19.73	-6.06	6.06	7.09	0	0	#NULL!
253	1	65	172	83	28.1	3	#NULL!	1	0	0	0	0	0	1	0	1	1	84	1	0	0	60	22.88	21.64	-1.24	1.24	28.53	0	0	#NULL!
254	1	82	171	76	26	2	#NULL!	1	0	1	0	0	0	0	0	2	2	88	1	0	0	60	9.8	35.75	25.95	25.95	17.36	0	0	#NULL!
255	1	56	176	90	29.1	2	#NULL!	1	0	0	1	0	0	0	0	2	2	80	1	0	0	60	18.89	64.07	45.18	45.18	14.26	0	1	#NULL!
256	1	58	175	86	28.1	1	1	1	0	0	0	1	0	0	0	1	1	79	1	0	0	60	4.8	11.82	7.02	7.02	4.77	0	0	#NULL!
257	1	79	187	100	28.6	2	#NULL!	1	0	0	0	0	1	0	0	2	2	132	0	1	0	45	17.83	98.23	80.4	80.4	21.86	0	0	#NULL!
258	1	65	174	93	30.7	1	1	1	0	0	1	0	1	0	0	1	1	84	1	0	0	60	4.8	4.8	0	0	7.29	0	0	#NULL!
259	1	70	175	76	24.8	1	0	1	0	0	0	0	0	0	0	0	0	84	1	0	0	60	4.8	20.72	15.92	15.92	5.35	0	0	#NULL!
261	1	70	182	85	25.7	3	#NULL!	0	0	0	0	0	0	0	0	1	1	73	1	0	0	60	4.8	6.103	1.3	1.3	5.17	0	0	#NULL!
262	2	77	165	65	23.9	1	0	1	0	0	0	0	0	0	0	0	0	70	1	0	0	60	4.8	12.56	7.76	7.76	8.13	0	0	#NULL!
263	1	71	176	98	31.6	1	1	1	0	1	1	1	2	0	0	3	3	89	1	0	0	60	8.768	19.92	11.15	11.15	14.27	0	0	#NULL!
264	1	72	175	72	23.5	2	#NULL!	0	0	0	0	0	0	0	0	1	1	83	1	0	0	60	8.68	14	5.32	5.32	6.47	0	0	#NULL!
266	1	63	180	90	27.8	3	#NULL!	1	0	0	0	0	0	0	0	1	1	61	1	0	0	60	4.8	4.8	0	0	3.59	0	0	#NULL!
267	2	61	161	63	24.3	1	0	1	0	0	1	0	1	0	0	1	1	61	1	0	0	60	5.262	18.32	13.06	13.06	15.74	0	0	#NULL!
268	2	66	165	84	30.9	3	#NULL!	1	0	0	1	1	0	0	0	3	3	48	1	0	0	60	4.8	7.535	2.74	2.74	5.31	0	0	#NULL!
269	1	68	173	83	27.7	2	#NULL!	1	0	0	1	0	1	0	0	2	2	90	1	0	0	60	8.375	29.11	20.73	20.73	19.56	0	0	#NULL!
270	1	83	172	69	23.3	2	#NULL!	0	0	0	0	0	0	0	0	2	2	154	0	1	0	38	20.5	118.4	97.9	97.9	29.28	0	0	#NULL!
271	2	72	162	65	24.8	1	0	0	0	0	1	0	1	0	0	1	1	58	1	0	0	60	10.45	309.6	299.15	299.15	5.06	0	0	#NULL!
272	1	39	183	77	23	2	#NULL!	1	0	0	0	0	0	0	0	2	2	1099	0	0	1	20	169.1	498.6	329.5	329.5	145.6	0	1	#NULL!
273	1	72	171	75	25.6	1	0	0	0	0	0	0	0	0	0	0	0	126	0	1	0	49	15.93	35.11	19.18	19.18	16.99	0	0	#NULL!
274	1	79	170	92	31.8	2	#NULL!	1	0	0	0	0	1	0	0	1	1	96	1	0	0	60	18.78	60.14	41.36	41.36	36.34	0	0	#NULL!
275	1	58	183	100	29.9	3	#NULL!	1	0	1	1	1	1	0	0	4	3	89	1	0	0	60	9.969	41.25	31.28	31.28	23.15	0	0	#NULL!
276	1	67	180	82	25.3	2	#NULL!	1	0	1	0	1	0	0	0	4	3	107	1	0	0	60	4.8	19.9	15.1	15.1	5.83	0	0	#NULL!
277	1	67	174	85	28.1	1	1	0	0	0	0	1	1	0	0	1	1	100	1	0	0	60	11.65	19.71	8.06	8.06	23.27	0	0	#NULL!
278	1	72	186	91	26.3	1	1	1	0	0	0	0	0	0	0	0	0	108	0	1	0	58	11.66	12.38	0.72	0.72	30.1	0	0	#NULL!
279	1	36	183	61	18.2	3	#NULL!	1	0	0	0	0	0	0	1	1	1	84	1	0	0	60	5.961	24.07	18.11	18.11	15.12	0	0	#NULL!
280	1	86	168	55	19.5	1	0	0	0	0	0	0	0	0	0	0	0	83	1	0	0	60	28.04	13.48	-14.56	14.56	20.05	0	0	#NULL!
281	1	66	178	65	20.5	3	#NULL!	0	0	0	0	0	1	0	0	1	1	86	1	0	0	60	10.87	8.537	-2.33	2.33	64.97	0	0	#NULL!
282	1	78	169	77	27	3	#NULL!	1	0	0	1	0	0	0	0	3	3	196	0	0	1	29	7.556	20.78	13.22	13.22	70	0	0	#NULL!
283	1	64	180	84	25.9	2	#NULL!	1	0	1	0	0	0	0	0	2	2	90	1	0	0	60	7.327	29.67	22.34	22.34	7.98	0	0	#NULL!
284	1	74	180	76	23.5	3	#NULL!	1	0	1	0	0	1	0	0	2	2	57	1	0	0	60	15	31.77	16.77	16.77	13.97	0	0	#NULL!
285	1	66	182	89	26.9	3	#NULL!	1	0	1	0	0	0	0	0	2	2	60	1	0	0	60	6.414	7.681	1.27	1.27	7.22	0	0	#NULL!
286	1	75	168	75	26.6	2	#NULL!	1	0	0	0	1	0	0	0	2	2	87	1	0	0	60	17.1	12.02	-5.08	5.08	10.07	0	1	#NULL!
287	1	67	181	125	38.2	3	#NULL!	1	1	1	1	0	1	1	0	4	3	79	1	0	0	60	18.56	31.21	12.65	12.65	12.46	0	0	#NULL!
288	1	59	185	75	21.9	1	1	0	0	0	0	1	1	0	0	1	1	86	1	0	0	60	4.8	5.121	0.32	0.32	3	0	0	#NULL!
289	1	66	176	80	25.8	1	1	1	0	0	0	1	1	0	0	1	1	63	1	0	0	60	8.733	27.58	18.85	18.85	5.84	0	0	#NULL!
290	1	67	174	85	28.1	2	#NULL!	1	0	0	0	0	0	0	0	1	1	130	0	1	0	48	6.026	203.6	197.57	197.57	9.23	0	0	#NULL!
292	1	61	176	90	29.1	3	#NULL!	1	0	0	0	0	1	0	0	1	1	66	1	0	0	60	7.601	20.83	13.23	13.23	78.49	0	0	#NULL!
293	1	69	176	78	25.2	2	#NULL!	1	0	0	0	0	0	1	0	1	1	69	1	0	0	60	8.275	19.43	11.15	11.15	18.15	0	0	#NULL!
294	1	83	164	70	26	2	#NULL!	1	1	0	1	0	2	0	0	3	3	88	1	0	0	60	4.8	76.28	71.48	71.48	9.74	0	0	#NULL!
295	1	65	166	81	29.4	1	0	1	0	0	1	0	0	0	0	1	1	100	1	0	0	60	12.55	14.05	1.5	1.5	9.9	0	0	#NULL!
296	1	78	172	85	28.7	2	#NULL!	1	0	0	1	0	0	0	0	2	2	89	1	0	0	60	6.62	13.9	7.28	7.28	15.14	0	0	#NULL!
297	1	52	174	104	34.4	1	0	1	0	1	0	0	1	0	0	1	1	71	1	0	0	60	19.84	26.28	6.44	6.44	8.43	0	0	#NULL!
298	2	60	159	59	23.3	1	0	0	0	0	0	0	0	0	0	0	0	60	1	0	0	60	4.8	10.81	6.01	6.01	3	0	0	#NULL!
299	1	71	180	78	24.1	2	#NULL!	1	0	0	0	0	1	0	0	1	1	79	1	0	0	60	10.21	9.424	-0.79	0.79	6.98	0	0	#NULL!
300	2	79	165	61	22.4	3	#NULL!	1	0	0	0	0	0	0	0	1	1	88	0	1	0	54	14.15	39.91	25.76	25.76	35.45	0	0	#NULL!
301	1	63	180	94	29	1	0	0	0	0	0	0	0	0	0	0	0	92	1	0	0	60	4.8	22.29	17.49	17.49	3.88	0	0	#NULL!
302	1	74	179	87	27.2	2	#NULL!	1	0	0	1	0	0	0	0	2	2	69	1	0	0	60	11.59	10.48	-1.11	1.11	21.89	0	0	#NULL!
303	2	73	170	74	25.6	1	1	1	0	1	0	0	0	0	0	1	1	48	1	0	0	60	27.41	11.07	-16.34	16.34	3.65	0	0	#NULL!
304	1	58	182	81	24.5	1	1	1	0	0	0	0	0	0	0	0	0	89	1	0	0	60	17.22	14.17	-3.05	3.05	9.99	0	0	#NULL!
305	1	66	182	92	27.8	2	#NULL!	1	0	0	0	0	1	0	0	1	1	150	0	1	0	41	11.62	52.6	40.98	40.98	6.02	0	0	#NULL!
306	1	70	175	85	27.8	1	0	1	0	0	0	0	0	0	0	0	0	76	1	0	0	60	8.679	6.79	-1.89	1.89	5.39	0	0	#NULL!
308	1	69	165	90	33.1	1	1	1	0	0	0	0	0	0	0	0	0	75	1	0	0	60	4.8	14.38	9.58	9.58	7.85	0	0	#NULL!
309	1	68	174	80	26.4	1	1	1	0	0	0	1	0	0	0	2	2	87	1	0	0	60	12.73	20.83	8.1	8.1	13.04	0	0	#NULL!
310	1	58	182	81	24.5	3	#NULL!	1	0	0	0	0	1	1	0	1	1	83	1	0	0	60	42.27	10.07	-32.2	32.2	10.39	0	0	#NULL!
311	1	64	177	111	35.4	1	1	1	0	1	0	1	0	0	0	2	2	70	1	0	0	60	4.8	4.8	0	0	10.87	0	0	1
312	2	71	164	60	22.3	1	1	1	1	0	1	1	0	0	0	3	3	68	1	0	0	60	4.8	66.08	61.28	61.28	4.83	0	0	1
313	1	83	173	69	23.1	1	1	1	0	0	0	1	0	0	0	1	1	74	1	0	0	60	4.8	4.8	0	0	24.28	0	0	1
314	1	78	170	70	24.2	1	0	1	0	1	1	0	0	0	0	2	2	99	1	0	0	60	18.43	10.58	-7.85	7.85	15.42	0	0	#NULL!
315	1	69	192	125	33.9	2	#NULL!	1	0	1	1	0	2	0	0	4	3	953	0	0	1	20	95.06	149.1	54.04	54.04	242.1	0	1	#NULL!
316	1	84	174	73	24.1	3	#NULL!	1	0	0	1	0	2	0	0	2	2	106	0	1	0	58	10.22	17.05	6.83	6.83	19.55	0	0	#NULL!
318	1	54	183	92	27.5	1	0	1	0	0	1	1	1	0	0	2	2	79	1	0	0	60	15.75	15.59	-0.16	0.16	10.81	0	0	#NULL!
319	1	81	168	73	25.9	3	#NULL!	1	0	0	0	0	2	0	0	1	1	98	1	0	0	60	22.2	16.92	-5.28	5.28	10.01	0	0	#NULL!
320	1	72	180	102	31.5	1	1	1	0	1	1	0	2	1	0	2	2	113	0	1	0	55	17.84	16.95	-0.89	0.89	5.95	0	0	1
321	2	80	158	67	26.8	1	1	1	0	0	1	0	0	0	0	1	1	86	0	1	0	55	4.8	80.97	76.17	76.17	10.25	0	0	#NULL!
322	2	36	165	80	29.4	3	#NULL!	0	0	0	0	0	0	0	0	1	1	74	1	0	0	60	4.8	5.711	0.91	0.91	4.51	0	0	#NULL!
323	1	71	174	75	24.8	1	1	1	0	0	0	0	2	0	0	0	0	92	1	0	0	60	5.923	20.86	14.94	14.94	12.63	0	0	#NULL!
324	1	79	176	88	28.4	1	0	1	0	1	1	0	0	1	0	2	2	136	0	1	0	44	39.94	5.891	-34.05	34.05	8.31	0	1	1
325	2	70	160	63	24.6	1	0	1	0	0	1	0	0	0	0	2	2	79	1	0	0	60	11.65	36.51	24.86	24.86	74.69	0	0	#NULL!
326	1	80	178	80	25.2	1	0	1	0	0	0	0	0	1	0	0	0	115	0	1	0	53	4.8	27.9	23.1	23.1	22.37	0	0	#NULL!
327	1	59	168	78	27.6	2	#NULL!	1	0	1	1	0	1	0	0	3	3	70	1	0	0	60	6.143	33.68	27.54	27.54	47.91	0	1	#NULL!
328	1	59	178	98	30.9	1	0	1	0	0	0	0	1	0	0	0	0	74	1	0	0	60	4.8	4.8	0	0	4.21	0	0	#NULL!
329	1	77	170	80	27.7	2	#NULL!	1	0	1	0	0	0	0	0	2	2	96	1	0	0	60	11.15	35.89	24.74	24.74	10.77	0	0	1
330	2	58	168	58	20.5	3	#NULL!	1	0	0	0	0	1	0	0	2	2	79	1	0	0	60	4.8	13.85	9.05	9.05	5.03	0	0	#NULL!
331	1	80	180	60	18.5	2	#NULL!	1	0	0	1	0	0	0	0	2	2	66	1	0	0	60	4.8	89.87	85.07	85.07	7.76	0	1	#NULL!
332	2	50	149	70	31.5	2	#NULL!	1	0	0	0	0	1	0	0	2	2	79	1	0	0	60	6.708	37.01	30.3	30.3	7.92	0	0	#NULL!
333	1	71	184	75	22.2	2	#NULL!	0	0	0	0	0	0	0	0	1	1	99	1	0	0	60	35.73	162	126.27	126.27	22.91	0	0	#NULL!
334	2	81	154	74	31.2	1	0	1	1	1	1	0	0	0	0	3	3	156	0	0	1	28	9.443	50.41	40.97	40.97	25.79	0	1	#NULL!
335	1	68	178	84	26.5	1	1	0	1	0	0	1	1	0	0	2	2	101	1	0	0	60	4.8	15.59	10.79	10.79	3.36	0	0	#NULL!
336	2	72	156	53	21.8	1	1	1	1	0	0	0	0	1	0	1	1	116	0	1	0	40	8.607	8.608	0	0	28.48	0	0	#NULL!
337	1	77	176	91	29.4	1	1	1	1	1	0	1	0	0	0	3	3	77	1	0	0	60	25.61	20.16	-5.45	5.45	11.49	0	0	#NULL!
338	2	63	164	53	19.7	1	0	1	0	0	0	1	2	0	0	1	1	70	1	0	0	60	4.8	10.54	5.74	5.74	158.9	0	1	#NULL!
339	2	57	170	65	22.5	2	#NULL!	0	0	0	0	0	0	0	0	1	1	71	1	0	0	60	45.97	5.093	-40.88	40.88	3.98	0	0	#NULL!
340	1	70	175	81	26.4	2	#NULL!	0	0	0	0	1	0	0	0	2	2	84	1	0	0	60	11.75	8.715	-3.03	3.03	7.67	0	0	#NULL!
341	1	71	174	75	24.8	1	0	1	0	0	0	1	0	0	0	1	1	122	0	1	0	51	11.13	68.92	57.79	57.79	13.19	0	0	#NULL!
342	1	76	178	84	26.5	1	1	1	0	1	0	1	0	0	0	2	2	78	1	0	0	60	10.61	10.75	0.14	0.14	24.69	0	0	#NULL!
343	1	74	177	71	22.7	2	#NULL!	1	0	0	0	0	0	0	0	1	1	87	1	0	0	60	6.429	65.66	59.23	59.23	11.94	0	0	#NULL!
344	1	84	167	65	23.3	1	0	1	1	0	1	1	0	0	0	3	3	102	1	0	0	60	15.16	24.63	9.47	9.47	33.17	0	0	#NULL!
345	1	86	178	75	23.7	1	1	1	1	0	0	1	0	1	0	2	2	180	0	1	0	31	33.13	266.3	233.17	233.17	31.97	0	1	#NULL!
346	1	75	170	74	25.6	2	#NULL!	1	0	0	1	0	0	0	0	2	2	97	1	0	0	60	4.8	34.13	29.33	29.33	62.17	0	1	#NULL!
347	1	87	168	76	26.9	1	0	1	0	1	1	1	0	0	0	3	3	89	1	0	0	60	6.404	29.5	23.1	23.1	17.66	1	0	#NULL!
348	2	73	160	85	33.2	1	1	1	0	0	0	0	0	0	0	0	0	68	1	0	0	60	5.291	24.6	19.31	19.31	8.77	0	0	#NULL!
349	1	69	187	151	43.2	2	#NULL!	1	1	0	1	0	0	1	0	3	3	98	1	0	0	60	100.8	21.98	-78.82	78.82	15.93	0	0	#NULL!
350	1	81	169	75	26.3	1	1	1	0	0	0	1	0	0	0	1	1	115	0	1	0	53	15.2	8.115	-7.08	7.08	15.16	0	0	#NULL!
351	1	74	170	80	27.7	3	#NULL!	1	1	0	1	0	0	1	0	4	3	550	0	0	1	20	53.72	107.5	53.78	53.78	137.4	0	1	#NULL!
352	1	67	166	75	27.2	1	1	1	0	0	0	1	0	0	0	1	1	102	1	0	0	60	4.8	5.14	0.34	0.34	4.03	0	0	#NULL!
353	1	70	180	70	21.6	3	#NULL!	1	0	0	1	1	0	0	0	4	3	247	0	0	1	23	131.9	228.7	96.8	96.8	130.9	0	0	#NULL!
354	1	71	180	95	29.3	1	1	1	0	0	0	1	1	0	0	1	1	59	1	0	0	60	6.528	11.03	4.5	4.5	33.24	0	0	#NULL!
355	1	53	182	82	24.8	1	1	0	0	0	0	1	1	0	0	1	1	64	1	0	0	60	6.862	5.32	-1.54	1.54	12.98	0	0	#NULL!
356	1	60	178	80	25.2	1	1	1	0	0	1	1	0	0	0	2	2	92	1	0	0	60	4.8	29.94	25.14	25.14	6.06	0	0	#NULL!
357	1	62	168	70	24.8	1	0	1	0	0	0	0	0	1	0	0	0	64	1	0	0	60	15.14	15.41	0.27	0.27	13.72	0	0	#NULL!
358	2	56	160	55	21.5	1	0	1	0	0	0	0	1	0	0	0	0	58	1	0	0	60	4.8	14.49	9.69	9.69	3	0	0	#NULL!
359	2	65	155	72	30	1	1	1	0	0	0	0	2	0	0	0	0	67	1	0	0	60	4.8	6.338	1.54	1.54	5.15	0	0	#NULL!
360	1	72	164	59	21.9	3	#NULL!	1	0	0	0	0	1	0	0	1	1	109	0	1	0	58	13.41	22.07	8.66	8.66	26.24	0	0	#NULL!
361	2	79	155	72	30	1	0	1	0	0	0	0	0	0	0	0	0	61	1	0	0	60	13.14	9.855	-3.28	3.28	7.39	0	0	#NULL!
362	1	76	174	90	29.7	3	#NULL!	1	0	1	1	0	2	0	0	3	3	112	0	1	0	55	19.78	78.24	58.46	58.46	23.88	0	0	#NULL!
363	1	73	170	70	24.2	2	#NULL!	1	1	1	1	0	1	0	0	5	3	163	0	1	0	36	43	98.02	55.02	55.02	10.39	0	0	#NULL!
365	2	59	150	45	20	1	0	1	0	1	1	0	0	0	0	3	3	115	0	1	0	42	32.87	43.08	10.21	10.21	12.92	0	0	#NULL!
366	1	73	181	108	33	1	0	1	0	1	0	0	0	0	0	1	1	71	1	0	0	60	10.55	9.13	-1.42	1.42	7.44	0	0	#NULL!
368	1	75	178	80	25.2	3	#NULL!	0	0	0	0	0	1	0	0	1	1	85	1	0	0	60	9.874	8.113	-1.76	1.76	7.32	0	0	#NULL!
369	1	75	165	85	31.2	1	1	1	0	0	0	1	1	0	0	1	1	90	1	0	0	60	4.8	13.98	9.18	9.18	307.4	0	0	#NULL!
370	1	80	180	83	25.6	3	#NULL!	1	0	1	1	0	0	0	0	3	3	93	1	0	0	60	19.61	17.07	-2.54	2.54	20.56	0	0	#NULL!
371	1	80	170	79	27.3	2	#NULL!	0	0	0	0	0	0	0	0	1	1	83	1	0	0	60	11.9	22.89	10.99	10.99	132.6	0	1	#NULL!
372	1	59	173	68	22.7	2	#NULL!	1	0	0	0	0	1	0	0	1	1	51	1	0	0	60	6.521	14.74	8.22	8.22	6.19	0	0	#NULL!
374	1	69	183	90	26.9	1	1	0	0	0	0	1	2	0	0	1	1	76	1	0	0	60	7.523	9.652	2.13	2.13	5.69	0	0	#NULL!
375	1	73	174	73	24.1	1	0	1	0	0	1	0	0	1	0	1	1	84	1	0	0	60	14.59	38.42	23.83	23.83	23.83	0	0	#NULL!
376	1	62	183	81	24.2	1	0	0	1	1	1	0	0	1	0	3	3	86	1	0	0	60	18.38	25.63	7.25	7.25	65.68	0	0	#NULL!
377	1	76	173	65	21.7	1	0	1	1	1	1	1	0	0	0	5	3	155	0	1	0	38	57.12	40.14	-16.98	16.98	67.66	0	1	#NULL!
378	1	78	169	69	24.2	1	0	1	0	0	0	0	0	0	0	0	0	149	0	1	0	40	4.8	4.8	0	0	20	0	0	#NULL!
379	2	70	161	85	32.8	1	0	1	0	0	1	0	0	0	0	1	1	53	1	0	0	60	4.8	4.8	0	0	15.11	0	0	#NULL!
380	1	83	169	89	31.2	3	#NULL!	0	0	0	0	0	0	0	0	1	1	71	1	0	0	60	4.8	6.11	1.31	1.31	21.21	0	0	#NULL!
381	1	69	170	90	31.1	3	#NULL!	1	0	0	1	0	2	0	0	2	2	93	1	0	0	60	11.91	5.673	-6.24	6.24	12.01	0	0	#NULL!
382	1	70	176	74	23.9	2	#NULL!	0	0	0	0	0	0	0	0	1	1	78	1	0	0	60	9.755	111.6	101.84	101.84	9.18	0	0	#NULL!
383	2	75	164	74	27.5	1	0	1	0	0	0	1	0	1	0	2	2	106	0	1	0	44	16.97	20.03	3.06	3.06	15.6	0	0	#NULL!
384	1	74	178	67	21.1	1	0	1	0	1	0	0	1	0	0	1	1	98	1	0	0	60	6.664	18.29	11.63	11.63	18.2	0	0	#NULL!
385	1	80	166	72	26.1	2	#NULL!	1	0	0	1	0	0	0	0	2	2	101	1	0	0	60	18.17	134.6	116.43	116.43	33.43	0	0	#NULL!
386	1	46	176	89	28.7	2	#NULL!	0	0	1	1	0	0	0	0	4	3	586	0	0	1	20	47.64	237.4	189.76	189.76	90.78	0	1	#NULL!
387	2	50	170	71	24.6	3	#NULL!	0	0	0	0	0	0	0	0	2	2	162	0	0	1	29	6.311	5.31	-1	1	24.12	0	0	#NULL!
389	2	75	159	81	32	1	0	1	0	0	1	0	1	0	0	1	1	68	1	0	0	60	4.8	18.95	14.15	14.15	49.07	0	0	#NULL!
390	1	62	176	80	25.8	1	1	0	1	1	1	0	0	1	0	3	3	96	1	0	0	60	14.87	10.56	-4.31	4.31	51.23	0	1	#NULL!
391	1	75	177	83	26.5	2	#NULL!	1	0	0	1	0	0	0	0	3	3	130	0	1	0	47	17.22	81.36	64.14	64.14	15.86	0	0	#NULL!
392	1	72	172	70	23.7	1	1	1	0	0	0	1	1	0	0	1	1	63	1	0	0	60	9.551	7.08	-2.47	2.47	5.42	0	0	#NULL!
393	1	75	177	82	26.2	3	#NULL!	1	0	1	1	1	0	0	0	4	3	67	1	0	0	60	4.8	10.28	5.48	5.48	14.01	0	0	#NULL!
394	1	64	174	81	26.8	3	#NULL!	1	0	0	1	0	2	0	0	2	2	82	1	0	0	60	4.8	20.46	15.66	15.66	4.42	0	0	#NULL!
395	1	60	178	84	26.5	2	#NULL!	1	0	0	1	0	1	1	0	2	2	70	1	0	0	60	4.8	4.8	0	0	4.96	0	0	#NULL!
396	1	60	163	61	23	3	#NULL!	1	0	0	0	0	1	0	0	1	1	124	0	1	0	52	9.877	11.77	1.89	1.89	9.86	0	0	#NULL!
398	1	59	170	80	27.7	1	0	1	0	0	1	0	2	0	0	1	1	127	0	1	0	50	29.85	28.72	-1.13	1.13	17.94	0	0	#NULL!
399	2	82	155	69	28.7	1	1	1	0	0	0	1	0	0	0	1	1	62	1	0	0	60	4.8	66.32	61.52	61.52	8.35	0	0	#NULL!
400	1	64	183	102	30.5	3	#NULL!	1	0	0	0	0	1	0	0	1	1	87	1	0	0	60	6.056	14.93	8.87	8.87	8.18	0	0	#NULL!
401	1	77	178	98	30.9	3	#NULL!	1	0	0	1	0	1	1	0	3	3	549	0	0	1	20	147.4	186.6	39.2	39.2	181.1	0	0	#NULL!
402	1	52	180	68	21	2	#NULL!	1	0	0	1	0	0	0	0	3	3	734	0	0	1	20	167.5	279.1	111.6	111.6	41.05	0	0	#NULL!
403	1	30	203	90	21.8	2	#NULL!	1	1	0	0	0	0	0	0	2	2	64	1	0	0	60	5.829	57.18	51.35	51.35	17.98	0	0	#NULL!
404	1	80	172	72	24.3	1	1	1	0	0	1	1	0	0	0	2	2	86	1	0	0	60	19.42	7.865	-11.55	11.55	15.96	0	0	#NULL!
405	1	68	181	95	29	2	#NULL!	1	0	0	0	0	0	0	0	1	1	84	1	0	0	60	12.85	147.6	134.75	134.75	9.29	0	0	#NULL!
406	2	73	170	70	24.2	1	0	1	0	0	0	1	0	0	0	1	1	136	0	1	0	33	16.4	16.12	-0.28	0.28	22.49	0	0	#NULL!
407	2	76	163	73	27.5	1	0	1	0	0	0	0	0	0	0	0	0	72	1	0	0	60	6.445	8.707	2.26	2.26	10.1	0	0	#NULL!
408	1	75	178	67	21.1	3	#NULL!	1	0	0	0	0	1	0	0	1	1	98	1	0	0	60	10.93	12.59	1.66	1.66	9.94	0	0	#NULL!
409	2	52	179	79	24.7	2	#NULL!	1	0	0	0	0	0	0	0	1	1	51	1	0	0	60	4.8	17.25	12.45	12.45	8.2	0	0	#NULL!
410	1	70	182	98	29.6	1	1	1	0	0	0	1	0	0	0	1	1	66	1	0	0	60	8.436	4.8	-3.64	3.64	10.71	0	0	#NULL!
411	1	79	180	90	27.8	1	1	1	0	1	0	1	0	0	0	2	2	84	1	0	0	60	4.8	10.9	6.1	6.1	3.36	0	0	#NULL!
412	1	68	175	66	21.6	1	1	1	0	0	0	1	0	0	0	1	1	68	1	0	0	60	4.8	8.807	4.01	4.01	5.04	0	1	#NULL!
413	1	82	180	85	26.2	1	1	1	0	0	1	1	0	0	0	2	2	132	0	1	0	45	19.18	4.8	-14.38	14.38	348	0	1	#NULL!
414	1	74	186	86	24.9	2	#NULL!	1	0	0	1	0	0	0	0	2	2	100	1	0	0	60	4.8	81.65	76.85	76.85	16.56	0	0	#NULL!
415	1	60	178	82	25.9	1	0	1	0	0	1	0	1	0	0	1	1	81	1	0	0	60	12.49	14.3	1.81	1.81	5.88	0	0	#NULL!
416	2	68	153	70	29.9	1	0	1	0	1	0	0	0	0	0	1	1	66	1	0	0	60	8.832	9.966	1.14	1.14	8.71	0	0	#NULL!
417	2	76	160	79	30.9	1	0	1	1	0	1	0	1	0	0	2	2	67	1	0	0	60	7.685	4.8	-2.89	2.89	13.01	0	0	#NULL!
419	1	61	187	107	30.6	1	0	0	0	0	0	0	0	0	0	0	0	79	1	0	0	60	7.703	8.146	0.45	0.45	5.38	0	0	#NULL!
420	1	74	172	110	37.2	1	0	1	0	1	1	0	0	1	0	3	3	136	0	1	0	44	16.63	21.28	4.65	4.65	51.7	0	1	#NULL!
421	2	58	162	98	37.3	1	0	1	0	1	0	1	0	0	0	2	2	73	1	0	0	60	4.8	14.5	9.7	9.7	20.57	0	1	#NULL!
422	1	73	180	83	25.6	2	#NULL!	1	0	0	0	0	0	0	0	1	1	81	1	0	0	60	15.16	21.21	6.05	6.05	12.59	0	0	#NULL!
423	2	69	167	54	19.4	1	0	0	0	0	0	0	1	1	0	0	0	52	1	0	0	60	4.8	5.562	0.76	0.76	3	0	0	#NULL!
424	1	58	183	92	27.5	1	0	0	0	0	0	0	0	0	0	0	0	92	1	0	0	60	7.747	11.45	3.7	3.7	6.38	0	0	#NULL!
425	1	51	175	66	21.6	2	#NULL!	1	0	0	1	0	1	0	0	2	2	80	1	0	0	60	8.084	53.49	45.41	45.41	43.72	0	1	#NULL!
426	1	57	179	74	23.1	3	#NULL!	1	0	0	0	0	0	1	0	1	1	112	0	1	0	59	12.78	14.77	1.99	1.99	15.53	0	0	#NULL!
428	1	63	175	111	36.2	3	#NULL!	1	0	0	0	0	0	1	0	1	1	62	1	0	0	60	10.58	11.9	1.32	1.32	27.13	0	0	#NULL!
429	2	55	161	88	33.9	3	#NULL!	1	0	0	0	0	1	0	0	2	2	113	0	1	0	43	13.07	7.647	-5.42	5.42	12.86	0	0	#NULL!
430	1	78	161	97	37.4	2	#NULL!	1	0	1	1	0	0	0	0	3	3	66	1	0	0	60	17.36	229.1	211.74	211.74	15.15	0	0	#NULL!
432	1	76	175	85	27.8	1	0	1	0	1	0	0	0	0	0	1	1	74	1	0	0	60	18.82	46.33	27.51	27.51	42.21	0	0	#NULL!
433	1	58	183	114	34	1	0	1	0	0	1	0	1	1	0	1	1	74	1	0	0	60	4.8	12.93	8.13	8.13	14.14	0	0	#NULL!
434	1	68	191	95	26	2	#NULL!	0	0	0	0	0	0	0	0	1	1	96	1	0	0	60	7.793	33.26	25.47	25.47	20.12	0	0	#NULL!
435	2	80	154	56	23.6	3	#NULL!	1	0	1	1	0	0	0	0	3	3	33	1	0	0	60	4.8	17.1	12.3	12.3	47.18	0	0	#NULL!
436	2	69	167	70	25.1	1	0	1	0	0	1	0	0	0	0	1	1	65	1	0	0	60	10.16	4.8	-5.36	5.36	14.42	0	0	#NULL!
437	1	74	158	63	25.2	1	0	1	0	0	1	0	0	0	0	1	1	80	1	0	0	60	9.573	8.851	-0.72	0.72	7.68	0	0	#NULL!
438	1	81	180	71	21.9	3	#NULL!	1	0	0	1	0	0	0	0	3	3	107	0	1	0	58	11.82	39.57	27.75	27.75	27.39	0	0	#NULL!
439	2	86	161	70	27	1	0	1	0	0	1	1	0	0	0	2	2	92	0	1	0	50	9.627	14.09	4.46	4.46	15.49	0	0	#NULL!
440	1	67	176	77	24.9	1	0	1	0	0	0	0	1	0	0	0	0	79	1	0	0	60	4.8	7.561	2.76	2.76	10.29	0	0	#NULL!
441	1	58	172	110	37.2	3	#NULL!	1	0	0	0	0	1	0	0	1	1	63	1	0	0	60	13.3	23.32	10.02	10.02	7.06	0	0	#NULL!
442	2	73	160	49	19.1	1	1	1	0	0	0	1	1	1	0	1	1	66	1	0	0	60	6.35	12.97	6.62	6.62	11.91	0	0	#NULL!
443	1	84	186	81	23.4	2	#NULL!	1	0	0	1	0	0	0	1	2	2	123	0	1	0	49	11.32	193.3	181.98	181.98	37.2	0	0	#NULL!
445	1	76	177	82	26.2	3	#NULL!	1	0	1	1	1	0	0	0	4	3	63	1	0	0	60	7.316	54.82	47.5	47.5	19.34	0	0	#NULL!
446	1	79	178	79	24.9	2	#NULL!	0	0	0	0	0	1	0	0	1	1	68	1	0	0	60	8.84	260.5	251.66	251.66	15.06	0	0	#NULL!
447	1	74	179	108	33.7	2	#NULL!	1	0	0	1	0	0	0	0	3	3	120	0	1	0	51	11.5	20	8.5	8.5	9.4	0	0	#NULL!
448	1	62	178	78	24.6	1	1	1	0	0	1	1	1	0	0	2	2	81	1	0	0	60	7.772	9.251	1.48	1.48	5.51	0	0	#NULL!
450	1	84	181	91	27.8	2	#NULL!	1	0	0	0	0	0	0	0	1	1	149	0	1	0	39	25.33	194.7	169.37	169.37	13.85	0	0	#NULL!
451	1	71	172	80	27	3	#NULL!	1	1	0	1	0	0	0	0	3	3	106	1	0	0	60	5.403	12.22	6.82	6.82	15.23	0	0	#NULL!
452	2	48	160	80	31.3	2	#NULL!	1	0	0	0	0	0	0	0	1	1	75	1	0	0	60	8.297	93.52	85.22	85.22	5.47	0	0	#NULL!
453	1	69	176	84	27.1	1	1	1	0	0	0	0	1	0	0	0	0	112	0	1	0	56	4.8	9.654	4.85	4.85	5.83	0	0	#NULL!
454	2	52	169	63	22.1	2	#NULL!	0	0	0	0	0	1	0	0	1	1	51	1	0	0	60	5.168	17.63	12.46	12.46	3	0	0	#NULL!
455	1	63	168	80	28.3	3	#NULL!	1	0	0	0	1	0	0	0	2	2	71	1	0	0	60	10.01	7.886	-2.12	2.12	9.05	0	0	#NULL!
456	1	73	168	80	28.3	2	#NULL!	1	0	0	0	0	0	0	0	1	1	82	1	0	0	60	7.266	28.25	20.98	20.98	6.29	0	0	#NULL!
458	1	72	172	68	23	1	0	1	0	0	1	0	0	0	0	1	1	84	1	0	0	60	20.52	23.55	3.03	3.03	8.49	0	0	#NULL!
459	1	62	176	85	27.4	3	#NULL!	1	0	0	0	0	1	0	0	1	1	69	1	0	0	60	8.301	10.08	1.78	1.78	3	0	0	#NULL!
460	1	64	165	82	30.1	3	#NULL!	1	0	0	0	0	0	0	0	1	1	70	1	0	0	60	4.8	8.507	3.71	3.71	12.57	0	0	#NULL!
461	1	54	176	107	34.5	3	#NULL!	0	0	0	0	0	0	0	0	1	1	70	1	0	0	60	7.978	36.67	28.69	28.69	5.88	0	0	#NULL!
462	2	57	150	61	27.1	1	0	1	0	0	0	0	0	0	0	0	0	88	0	1	0	57	8.073	66.73	58.66	58.66	59.11	0	0	#NULL!
463	2	70	172	69	23.3	3	#NULL!	1	0	0	0	0	0	0	0	1	1	81	1	0	0	60	5.705	5.787	0.08	0.08	76.89	0	0	#NULL!
464	1	75	167	90	32.3	1	0	1	1	0	1	0	0	0	0	3	3	136	0	1	0	44	22.88	37.84	14.96	14.96	42.63	0	1	#NULL!
465	2	74	159	68	26.9	1	1	1	0	1	0	0	0	0	0	1	1	83	0	1	0	58	7.845	46.17	38.32	38.32	7.52	0	0	#NULL!
466	1	73	176	80	25.8	1	0	1	0	0	0	0	0	0	0	0	0	88	1	0	0	60	24.25	8.478	-15.77	15.77	4.43	0	0	#NULL!
467	1	56	165	62	22.8	1	1	1	0	0	0	0	1	0	0	0	0	67	1	0	0	60	6.194	9.877	3.69	3.69	5.79	0	0	#NULL!
468	1	66	174	78	25.8	3	#NULL!	1	1	0	1	1	0	0	0	4	3	121	0	1	0	52	7.642	8.879	1.24	1.24	39.76	0	0	#NULL!
469	1	73	178	100	31.6	1	1	1	0	0	1	0	0	0	0	1	1	97	1	0	0	60	20.85	22.58	1.73	1.73	11.53	0	0	#NULL!
470	2	77	150	60	26.7	3	#NULL!	1	0	1	1	0	0	0	0	4	3	109	0	1	0	42	13.4	12.78	-0.62	0.62	15.65	0	0	#NULL!
471	1	60	168	74	26.2	1	0	1	0	0	0	0	0	0	0	0	0	68	1	0	0	60	10.57	21.78	11.21	11.21	14.69	0	0	#NULL!
472	1	81	170	62	21.5	2	#NULL!	0	0	0	0	0	1	0	0	1	1	132	0	1	0	45	18.23	58.49	40.26	40.26	28.5	0	0	#NULL!
473	2	78	160	54	21.1	1	0	1	0	0	0	0	0	0	0	1	1	408	0	0	1	20	47.79	344.3	296.51	296.51	316.5	0	0	#NULL!
474	1	76	165	58	21.3	1	1	1	0	0	1	0	0	0	0	2	2	103	1	0	0	60	37.58	59.67	22.09	22.09	35.2	0	0	#NULL!
476	1	75	170	83	28.7	1	1	1	0	0	1	0	0	1	0	1	1	100	1	0	0	60	4.8	15.29	10.49	10.49	20.39	0	0	#NULL!
478	2	82	168	73	25.9	1	0	1	1	0	1	0	1	1	0	2	2	146	0	1	0	30	11.83	19.85	8.02	8.02	15.25	0	0	#NULL!
479	1	73	174	95	31.4	2	#NULL!	1	0	0	0	0	1	0	0	1	1	92	1	0	0	60	7.75	84.24	76.49	76.49	39.2	0	0	#NULL!
480	1	54	182	110	33.2	2	#NULL!	1	0	0	0	0	1	0	0	1	1	69	1	0	0	60	7.602	8.053	0.45	0.45	7.27	0	0	#NULL!
481	1	70	168	94	33.3	3	#NULL!	1	0	0	1	0	0	0	0	2	2	87	1	0	0	60	11.19	37.86	26.67	26.67	38.18	0	0	#NULL!
482	2	59	169	54	18.9	2	#NULL!	1	0	0	0	0	0	1	0	1	1	64	1	0	0	60	23.31	69.01	45.7	45.7	72.57	0	1	#NULL!
484	1	66	180	106	32.7	1	1	1	0	0	0	1	0	0	0	1	1	92	1	0	0	60	16.5	25.49	8.99	8.99	15.09	0	0	#NULL!
485	1	68	186	90	26	1	1	1	0	1	0	1	1	0	0	2	2	91	1	0	0	60	4.8	433.7	428.9	428.9	12	0	0	#NULL!
486	2	72	166	84	30.5	1	0	0	0	0	0	0	1	0	0	0	0	64	1	0	0	60	4.8	4.8	0	0	19.98	0	0	#NULL!
487	1	51	185	103	30.1	3	#NULL!	1	0	0	0	0	1	1	0	1	1	65	1	0	0	60	10.37	11.42	1.05	1.05	3	0	0	#NULL!
488	1	52	176	63	20.3	2	#NULL!	0	1	0	0	1	1	0	0	4	3	290	0	0	1	20	27.74	41.17	13.43	13.43	32.77	0	0	#NULL!
489	1	72	176	109	35.2	3	#NULL!	1	0	0	1	0	0	0	0	2	2	138	0	1	0	44	8.769	111.8	103.03	103.03	32.57	0	0	#NULL!
490	1	69	167	98	35.1	1	0	1	0	0	0	1	0	0	0	1	1	122	0	1	0	51	93.41	19.72	-73.69	73.69	13.11	0	0	#NULL!
492	2	65	166	76	27.6	2	0	1	0	1	1	0	1	0	0	2	2	87	0	1	0	57	20.49	24.72	4.23	4.23	27.35	0	0	#NULL!
493	2	67	167	50	17.9	1	#NULL!	1	0	0	1	0	1	1	0	2	2	76	1	0	0	60	9.082	21.92	12.84	12.84	8.08	0	0	#NULL!
494	1	72	183	100	29.9	2	#NULL!	1	1	0	0	0	#NULL!	0	0	2	2	85	1	0	0	60	13.65	66.49	52.84	52.84	811.6	0	1	#NULL!
495	2	67	158	51	20.4	2	0	1	0	0	0	0	2	0	1	0	0	46	1	0	0	60	29.45	31.98	2.53	2.53	10.38	0	0	#NULL!
496	2	83	168	73	25.9	1	#NULL!	1	1	1	1	0	1	1	0	4	3	117	0	1	0	38	5.856	29.01	23.15	23.15	14.34	0	0	#NULL!
497	1	67	180	77	23.8	1	0	1	1	0	1	0	1	0	0	3	3	78	1	0	0	60	6.261	52.33	46.07	46.07	9.77	0	0	#NULL!
498	1	64	172	74	25	3	1	1	0	0	0	0	0	0	0	0	0	91	1	0	0	60	4.8	4.8	0	0	11.91	0	0	#NULL!
499	1	62	172	62	21	1	#NULL!	1	1	0	1	0	2	1	0	3	3	70	1	0	0	60	4.8	9.004	4.2	4.2	7.64	0	0	#NULL!
500	1	69	160	72	28.1	2	#NULL!	1	1	0	1	0	0	0	0	3	3	99	1	0	0	60	26.86	48.05	21.19	21.19	23.14	0	0	#NULL!
501	1	84	178	80	25.2	3	1	1	0	0	1	0	1	0	0	1	1	155	0	1	0	37	28.59	96.75	68.16	68.16	26.72	0	0	#NULL!
502	2	67	158	51	20.4	1	0	1	0	0	0	1	2	0	1	1	1	48	1	0	0	60	16.32	32.79	16.47	16.47	15.8	0	0	1
503	1	65	164	68	25.3	1	0	1	0	0	0	0	2	0	0	0	0	71	1	0	0	60	5.38	4.8	-0.58	0.58	13.78	0	0	#NULL!
504	1	77	164	66	24.5	1	0	1	0	1	1	0	2	0	0	2	2	79	1	0	0	60	10.16	4.8	-5.36	5.36	12.45	0	0	#NULL!
505	1	68	163	77	29	1	0	1	1	1	0	0	0	0	0	2	2	80	1	0	0	60	7.668	15.08	7.41	7.41	16.42	0	0	#NULL!
506	2	80	168	78	27.6	1	0	1	0	0	1	0	0	0	0	1	1	53	1	0	0	60	5.372	6.488	1.12	1.12	6.09	0	0	#NULL!
507	1	57	178	67	21.1	1	#NULL!	0	0	0	0	1	1	0	0	2	2	62	1	0	0	60	5.442	15.01	9.57	9.57	6.07	0	0	#NULL!
508	1	77	168	73	25.9	3	1	1	0	0	0	0	0	0	0	0	0	98	1	0	0	60	6.696	7.313	0.61	0.61	11.68	0	0	#NULL!
509	1	77	169	76	26.6	1	0	0	0	1	0	0	0	0	0	1	1	74	1	0	0	60	7.215	17.68	10.46	10.46	6.47	0	0	#NULL!
510	1	74	168	75	26.6	1	1	1	0	0	0	0	0	0	0	0	0	159	0	1	0	37	12.16	62.69	50.53	50.53	21	0	0	#NULL!
511	1	63	178	77	24.3	1	0	1	0	0	0	0	0	0	0	0	0	163	0	1	0	37	44.99	69.91	24.92	24.92	11.17	0	0	#NULL!
512	1	73	170	75	26	1	0	1	0	0	1	0	0	0	0	1	1	159	0	1	0	37	21.09	24.12	3.03	3.03	48.38	0	0	#NULL!
513	1	74	173	90	30.1	1	#NULL!	0	0	0	0	0	0	0	0	1	1	81	1	0	0	60	9.725	61.81	52.08	52.08	9.21	0	0	#NULL!
514	1	82	186	85	24.6	2	#NULL!	1	1	0	0	0	0	0	0	3	3	161	0	1	0	36	16.3	35.71	19.41	19.41	41.05	0	0	#NULL!
515	1	75	173	100	33.4	2	1	1	0	0	1	0	0	0	0	1	1	95	1	0	0	60	4.8	10.86	6.06	6.06	17.24	0	0	#NULL!
